# Supplementary material for: Family income and young adolescents’ perceived social position: associations with self-esteem and life satisfaction in the UK Millennium Cohort Study
Source: PubMed Central journal article supplement (PMC5050283; doi:10.1136/archdischild-2015-309651), 2016-03-08
Supplement: archdischild-2015-309651supp.pdf [file archdischild-2015-309651supp.pdf]

**Appendix 1.** Relationship between family income and young adolescents' perceived social position<sup>a</sup> (N = 11793)

|                         | <b>Compared to your friends, is your family?</b> |                |            |            |
|-------------------------|--------------------------------------------------|----------------|------------|------------|
|                         | Poorer                                           | About the same | Richer     | Don't know |
| <b>Family income</b>    | % (N)                                            | % (N)          | % (N)      | % (N)      |
| Lowest income quintile  | 21.1 (105)                                       | 19.2 (1542)    | 17.0 (160) | 22.4 (413) |
| Second quintile         | 29.5(120)                                        | 20.2 (1690)    | 17.6 (174) | 21.3 (403) |
| Third quintile          | 19.3 (95)                                        | 20.4 (1849)    | 19.8 (193) | 18.9 (372) |
| Fourth quintile         | 18.2 (88)                                        | 20.4 (1777)    | 19.5 (191) | 19.3 (379) |
| Highest income quintile | 11.9 (61)                                        | 19.9 (1623)    | 26.2 (230) | 18.2 (328) |
| <b>Total</b>            | 100 (469)                                        | 100 (8481)     | 100 (948)  | 100 (1895) |

<sup>a</sup> Kendall's tau-b: 0.04 ( $p < 0.001$ ): *don't know* group excluded from this analysis.

**Appendix 2.** Associations of young adolescents' perceived social position (i.e. *don't know* versus *about the same*) with self-esteem (N = 10229)

|                                                  | <b>Greater self-esteem (ordinal scores)</b> |                          | <b>Poor self-esteem (bottom 10% scores)<sup>a</sup></b> |                       |
|--------------------------------------------------|---------------------------------------------|--------------------------|---------------------------------------------------------|-----------------------|
|                                                  | Model A1                                    | Model A2 <sup>b</sup>    | Model B1                                                | Model B2 <sup>b</sup> |
|                                                  | Proportional OR (95% CI)                    | Proportional OR (95% CI) | OR (95% CI)                                             | OR (95% CI)           |
| <b>Compared to your friends, is your family?</b> |                                             |                          |                                                         |                       |
| About the same                                   | Ref.                                        | Ref.                     | Ref.                                                    | Ref.                  |
| Don't know                                       | 0.74 (0.66 – 0.82)                          | 0.72 (0.66 – 0.81)       | 1.41 (1.27 – 1.56)                                      | 1.40 (1.27 – 1.56)    |

OR = Odds ratio.

<sup>a</sup> Score range: 5 – 14 (out of a possible range of 5 – 20).

<sup>b</sup> Model A2 and B2 are adjusted for maternal age at first live birth, sex and ethnicity of the child. Analysis of perceived social position also adjusted for family income.

**Appendix 3.** Associations of young adolescents' perceived social position (i.e. *don't know* versus *about the same*) with life satisfaction (N = 10335)

|                                                  | <b>Greater life satisfaction (ordinal scores)</b> |                                                   | <b>Poor life satisfaction (bottom 10% scores)<sup>a</sup></b> |                                      |
|--------------------------------------------------|---------------------------------------------------|---------------------------------------------------|---------------------------------------------------------------|--------------------------------------|
|                                                  | Model C1<br>Proportional OR (95% CI)              | Model C2 <sup>b</sup><br>Proportional OR (95% CI) | Model D1<br>OR (95% CI)                                       | Model D2 <sup>b</sup><br>OR (95% CI) |
| <b>Compared to your friends, is your family?</b> |                                                   |                                                   |                                                               |                                      |
| About the same                                   | Ref.                                              | Ref.                                              | Ref.                                                          | Ref.                                 |
| Don't know                                       | 0.71 (0.64 – 0.79)                                | 0.71 (0.64 – 0.79)                                | 1.74 (1.46 – 2.07)                                            | 1.73 (1.46 – 2.06)                   |

OR = Odds ratio.

<sup>a</sup> Score range: 6 – 28 (out of a possible range of 6 – 42).

<sup>b</sup> Model C2 and D2 are adjusted for maternal age at first live birth, sex and ethnicity of the child. Analysis of perceived social position also adjusted for family income.

**Appendix 4.** Self-esteem and life satisfaction scale items

| <b>Self-esteem scale</b>                            | <b>Life satisfaction scale</b>              |
|-----------------------------------------------------|---------------------------------------------|
| On the whole, I am satisfied with myself            | How do you feel about your school work?     |
| I feel that I have a number of good qualities       | How do you feel about the way you look?     |
| I am able to do things as well as most other people | How do you feel about your family?          |
| I am a person of value                              | How do you feel about your friends?         |
| I feel good about myself                            | How do you feel about the school you go to? |
|                                                     | How do you feel about your life as a whole? |
